# Supplementary material for: N 2 O isotope approaches for source partitioning of N 2 O production and estimation of N 2 O reduction – validation with the 15 N gas-flux method in laboratory and field studies
Source: Copernicus journal article supplement (doi:10.5194/bg-17-5513-2020), 2020-11-14
Supplement: Supplementary file 1 [file bg-17-5513-2020-supplement.zip]

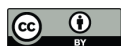

## *Supplement of*

# **N<sub>2</sub>O isotope approaches for source partitioning of N<sub>2</sub>O production and estimation of N<sub>2</sub>O reduction – validation with the <sup>15</sup>N gas-flux method in laboratory and field studies**

**Dominika Lewicka-Szczebak et al.**

*Correspondence to:* Dominika Lewicka-Szczebak ([dominika.lewicka-szczebak@uwr.edu.pl](mailto:dominika.lewicka-szczebak@uwr.edu.pl))

- [bg-17-5513-2020-supplement-title-page.pdf](#)
- [SP\\_O\\_Map.xlsx](#)
- [supplement.pdf](#)

The copyright of individual parts of the supplement might differ from the CC BY 4.0 License.
