# Supplementary material for: N 2 O isotope approaches for source partitioning of N 2 O production and estimation of N 2 O reduction – validation with the 15 N gas-flux method in laboratory and field studies
Source: Copernicus journal article supplement (doi:10.5194/bg-17-5513-2020), 2020-11-14
Supplement: Supplementary file 2 [file bg-17-5513-2020-supplement.zip]

## N<sub>2</sub>O isotope approaches for source partitioning of N<sub>2</sub>O production and estimation of N<sub>2</sub>O reduction – validation with <sup>15</sup>N gas-flux method in laboratory and field studies

Dominika Lewicka-Szczebak<sup>1</sup>, Maciej Piotr Lewicki<sup>2</sup> and Reinhard Well<sup>3</sup>

<sup>1</sup> Centre for Stable Isotope Research and Analysis, University of Göttingen, Büsgenweg 2, 37077 Göttingen, Germany

<sup>2</sup> Institute of Theoretical Physics, University of Wrocław, pl. M. Borna 9, 50-204 Wrocław, Poland

<sup>3</sup> Thünen-Institut of Climate-Smart Agriculture, Bundesallee 50, 38116 Braunschweig, Germany

Correspondence to: Dominika Lewicka-Szczebak (dominika.lewicka@uni-goettingen.de)

Table S1: Comparison of SP/O Map results of all calculation cases (Case 1 and Case 2) and mixing scenarios (bD-fD and bD-Ni).

|           |      | $r_{\text{N}_2\text{O}}$ |             |             |             | $f_{\text{bD}}$ |             |             |             |
|-----------|------|--------------------------|-------------|-------------|-------------|-----------------|-------------|-------------|-------------|
| scenarios |      | bD-fD                    |             | bD-Ni       |             | bD-fD           |             | bD-Ni       |             |
| cases     |      | Case1                    | Case2       | Case1       | Case2       | Case1           | Case2       | Case1       | Case2       |
| L1        | min  | 0.15                     | 0.14        | 0.14        | 0.14        | 0.96            | 0.79        | 0.98        | 0.84        |
|           | max  | 0.24                     | 0.24        | 0.26        | 0.24        | 1               | 1           | 1           | 1           |
|           | mean | <b>0.19</b>              | <b>0.18</b> | <b>0.19</b> | <b>0.18</b> | <b>0.99</b>     | <b>0.93</b> | <b>0.99</b> | <b>0.95</b> |
| L2        | min  | 0.16                     | 0.15        | 0.16        | 0.16        | 0.94            | 0.88        | 0.96        | 0.91        |
|           | max  | 0.52                     | 0.53        | 0.45        | 0.46        | 1               | 1           | 1           | 1           |
|           | mean | <b>0.27</b>              | <b>0.27</b> | <b>0.25</b> | <b>0.25</b> | <b>0.98</b>     | <b>0.96</b> | <b>0.99</b> | <b>0.97</b> |
| F1        | min  | 0.68                     | 0.70        | 0.44        | 0.48        | 0.62            | 0.55        | 0.81        | 0.66        |
|           | max  | 1.00                     | 1.00        | 0.76        | 0.77        | 0.84            | 0.83        | 0.91        | 0.87        |
|           | mean | <b>0.86</b>              | <b>0.86</b> | <b>0.62</b> | <b>0.64</b> | <b>0.74</b>     | <b>0.70</b> | <b>0.86</b> | <b>0.77</b> |
| F2        | min  | 0.30                     | 0.36        | 0.22        | 0.27        | 0.84            | 0.64        | 0.94        | 0.73        |
|           | max  | 0.43                     | 0.49        | 0.38        | 0.39        | 0.95            | 0.89        | 0.97        | 0.92        |
|           | mean | <b>0.38</b>              | <b>0.42</b> | <b>0.29</b> | <b>0.32</b> | <b>0.92</b>     | <b>0.77</b> | <b>0.96</b> | <b>0.83</b> |
| F3        | min  | 0.26                     | 0.27        | 0.25        | 0.25        | 0.97            | 0.92        | 0.98        | 0.94        |
|           | max  | 0.47                     | 0.47        | 0.46        | 0.46        | 1               | 1           | 1           | 1           |
|           | mean | <b>0.33</b>              | <b>0.32</b> | <b>0.32</b> | <b>0.32</b> | <b>0.99</b>     | <b>0.97</b> | <b>0.99</b> | <b>0.98</b> |

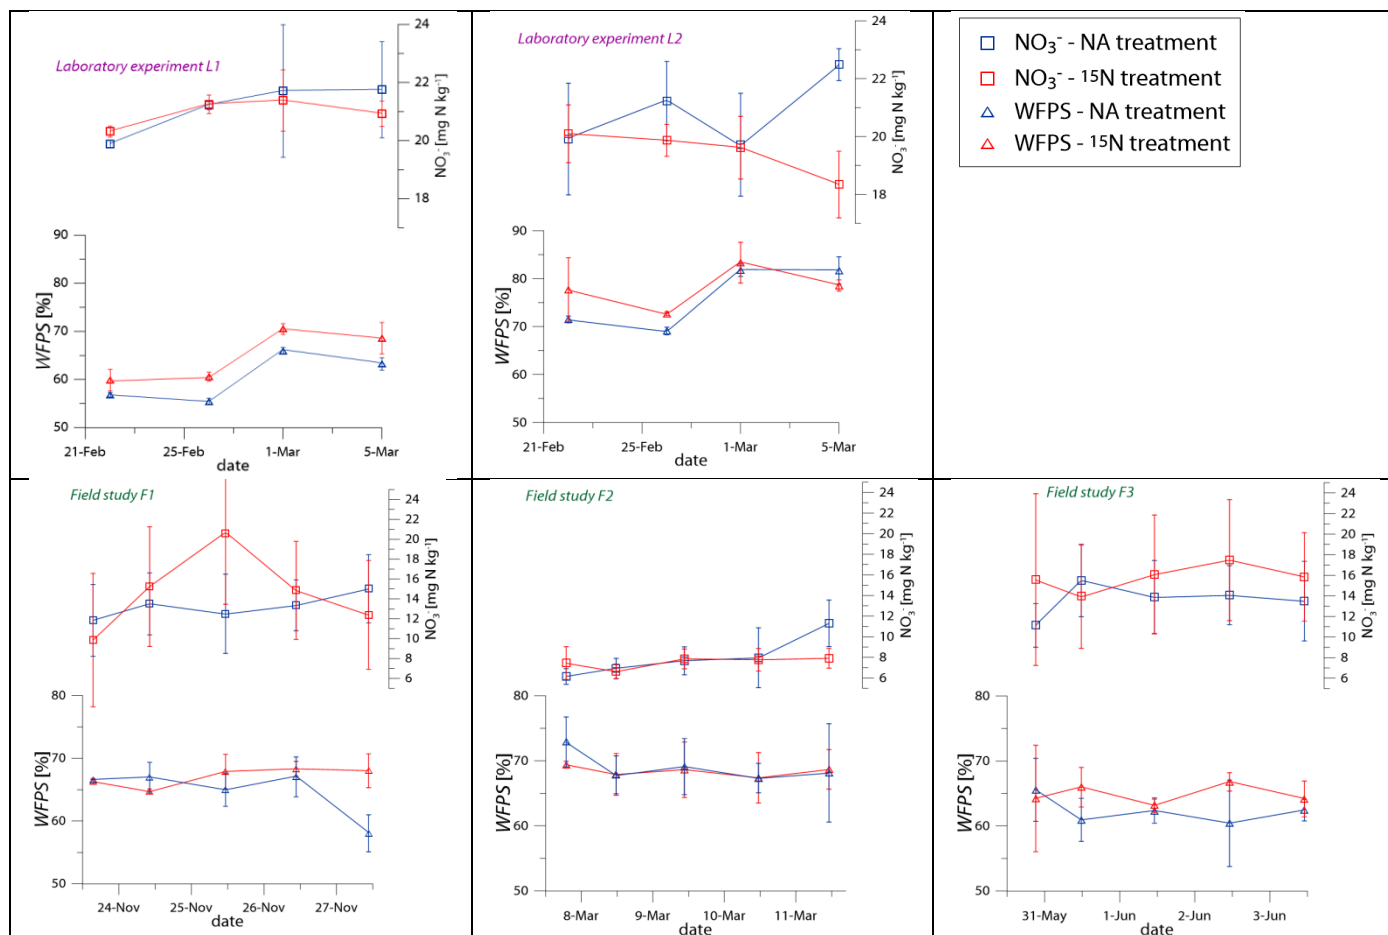

Fig. S1 Soil conditions during laboratory incubations and field campaigns. Water filled pore space (WFPS in %) and nitrate content in mg N kg<sup>-1</sup> dry soil is shown for NA treatment (blue symbols) and <sup>15</sup>N treatment (red symbols). Note different Y-Axis scaling for laboratory and field studies.

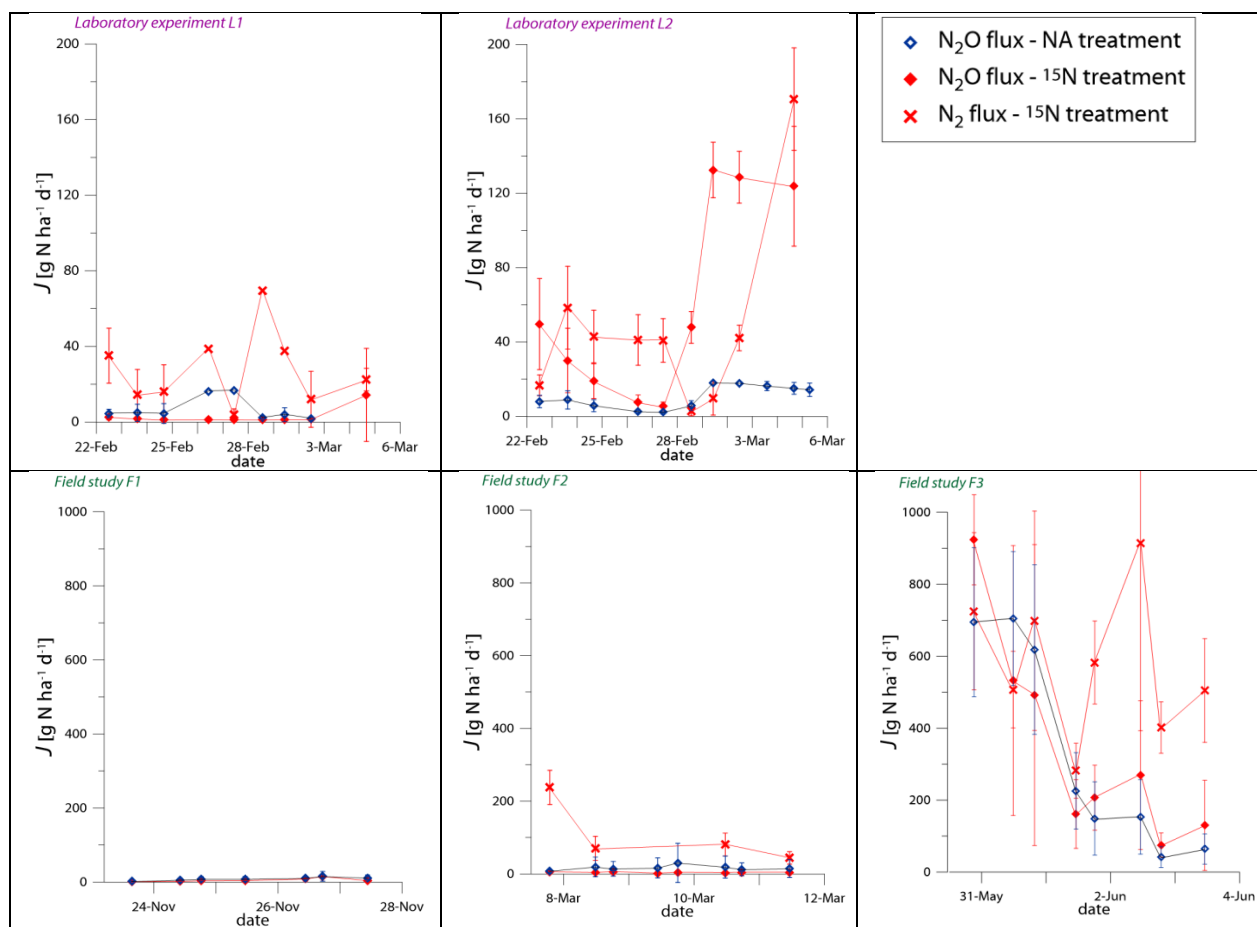

Fig. S2 Gas fluxes in  $g N ha^{-1} d^{-1}$ . Note different Y-Axis scaling for laboratory and field studies. Mean values for each sampling date with standard deviation ( $n=4$ ) are shown.  $N_2O$  flux (diamonds) in NA treatment (blue symbols) and  $^{15}N$  treatment (red symbols) and  $N_2$  flux determined in  $^{15}N$  treatment is shown (red crosses).

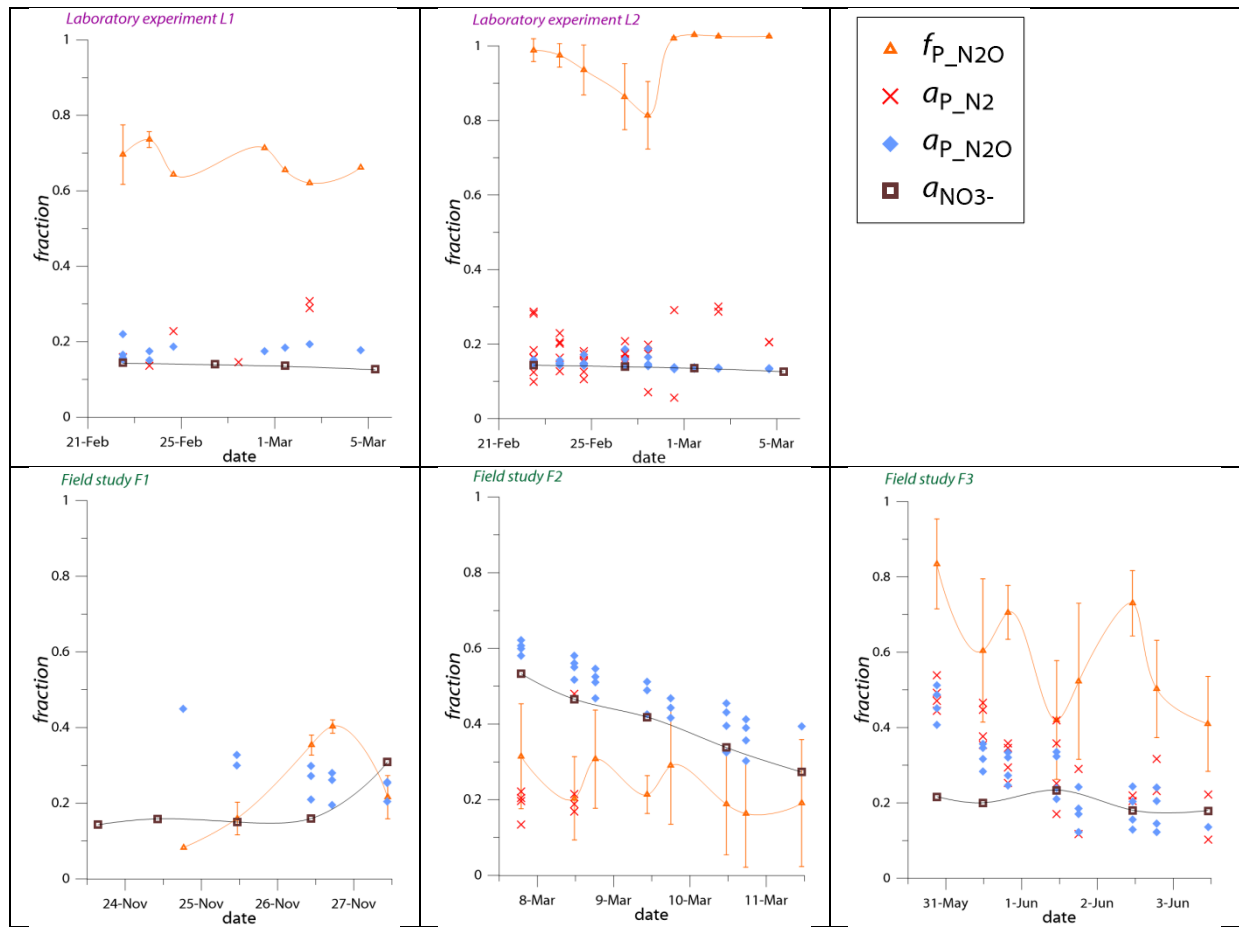

Fig. S3  $^{15}\text{N}$  abundance in total  $\text{NO}_3^-$  ( $a_{\text{NO}_3^-}$  – brown squares),  $\text{NO}_3^-$  pool producing  $\text{N}_2\text{O}$  ( $a_{\text{P\_N}_2\text{O}}$  – blue diamonds),  $\text{NO}_3^-$  pool producing  $\text{N}_2$  ( $a_{\text{P\_N}_2}$  – red crosses) and  $^{15}\text{N}$  pool-derived fraction of  $\text{N}_2\text{O}$  ( $f_{\text{P\_N}_2\text{O}}$  – orange triangles). For  $a_{\text{NO}_3^-}$  and  $f_{\text{P\_N}_2\text{O}}$  mean values for each sampling date with standard deviation ( $n=4$ ) are shown. For  $a_{\text{P\_N}_2}$  and  $a_{\text{P\_N}_2\text{O}}$  all individual values are shown (due to numerous missing data).

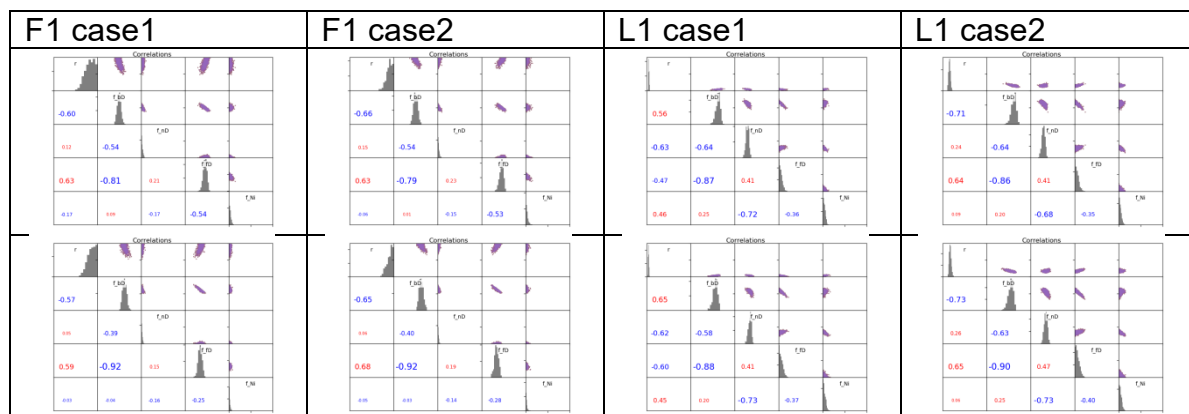

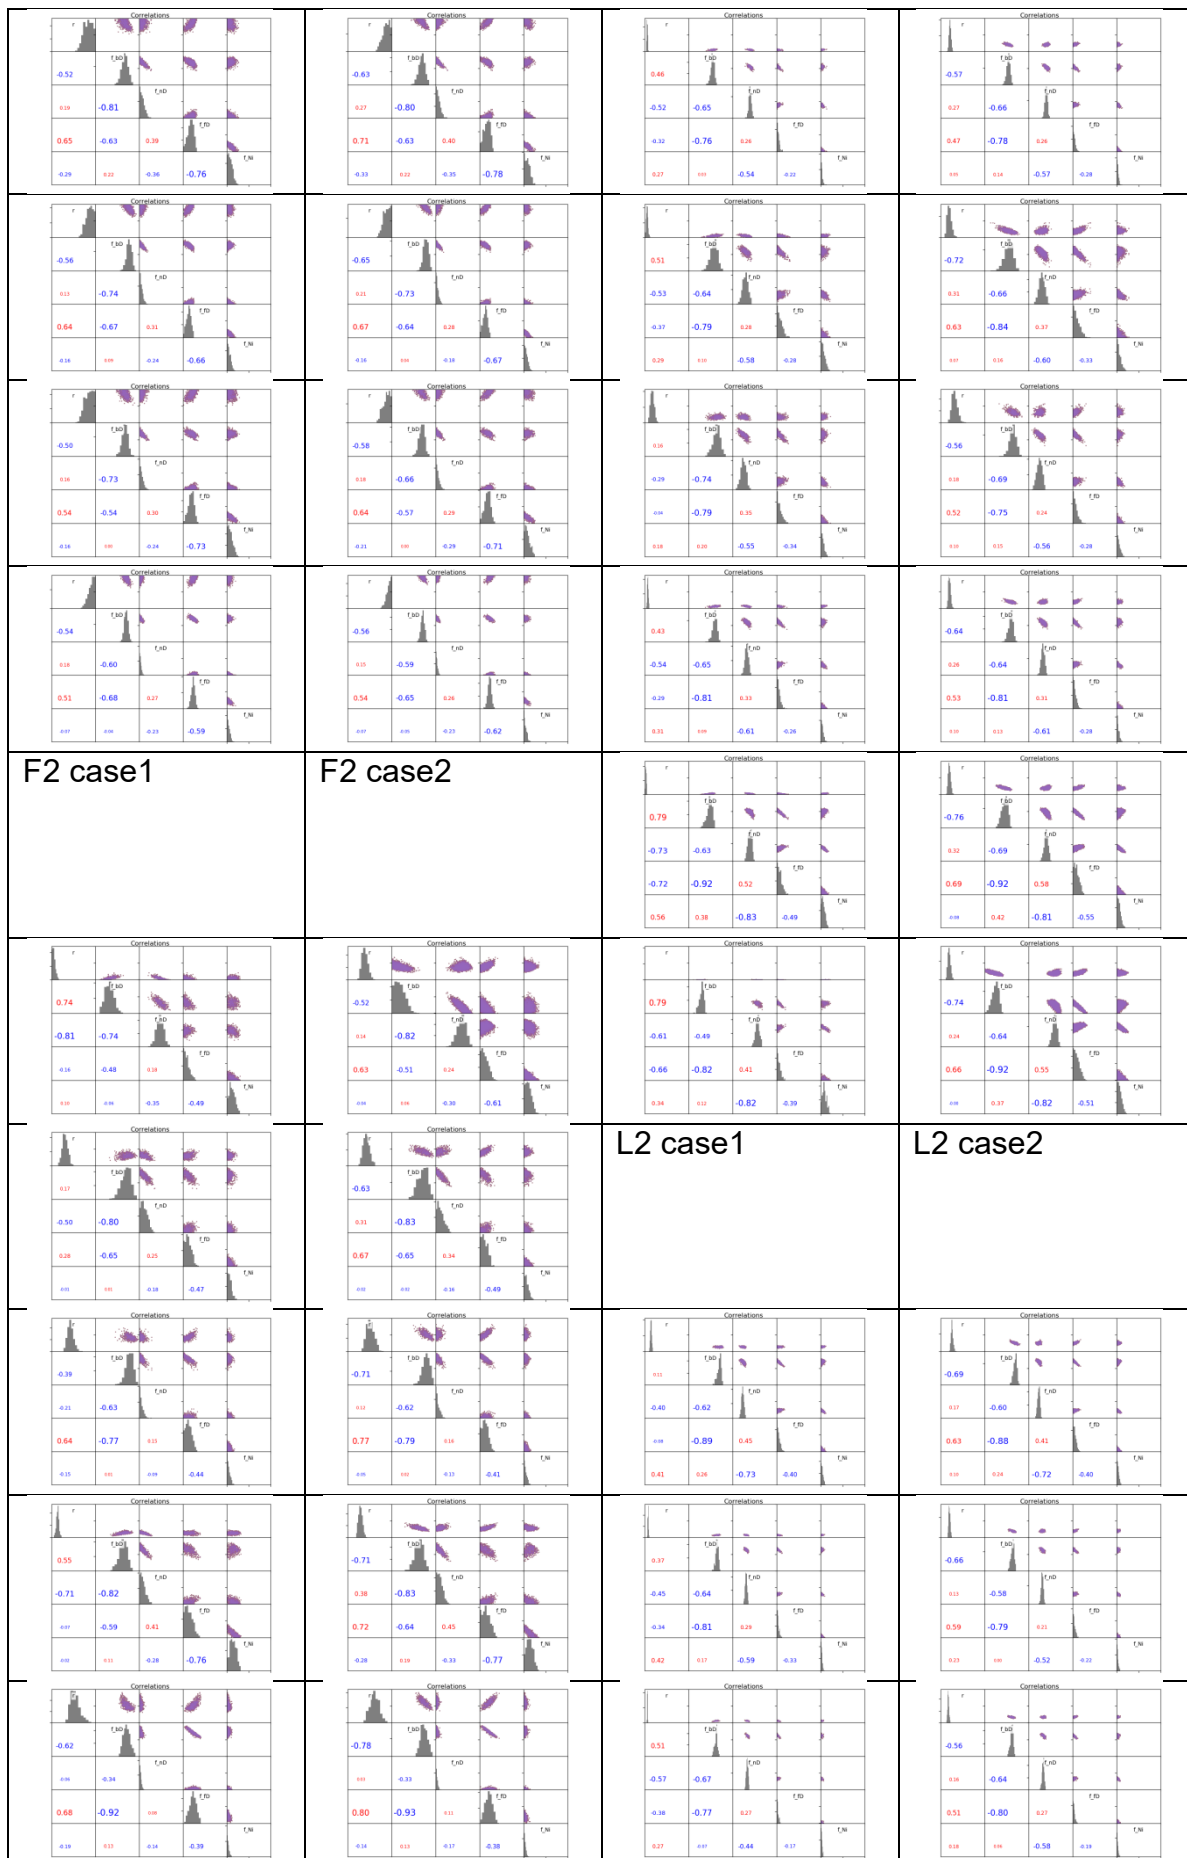

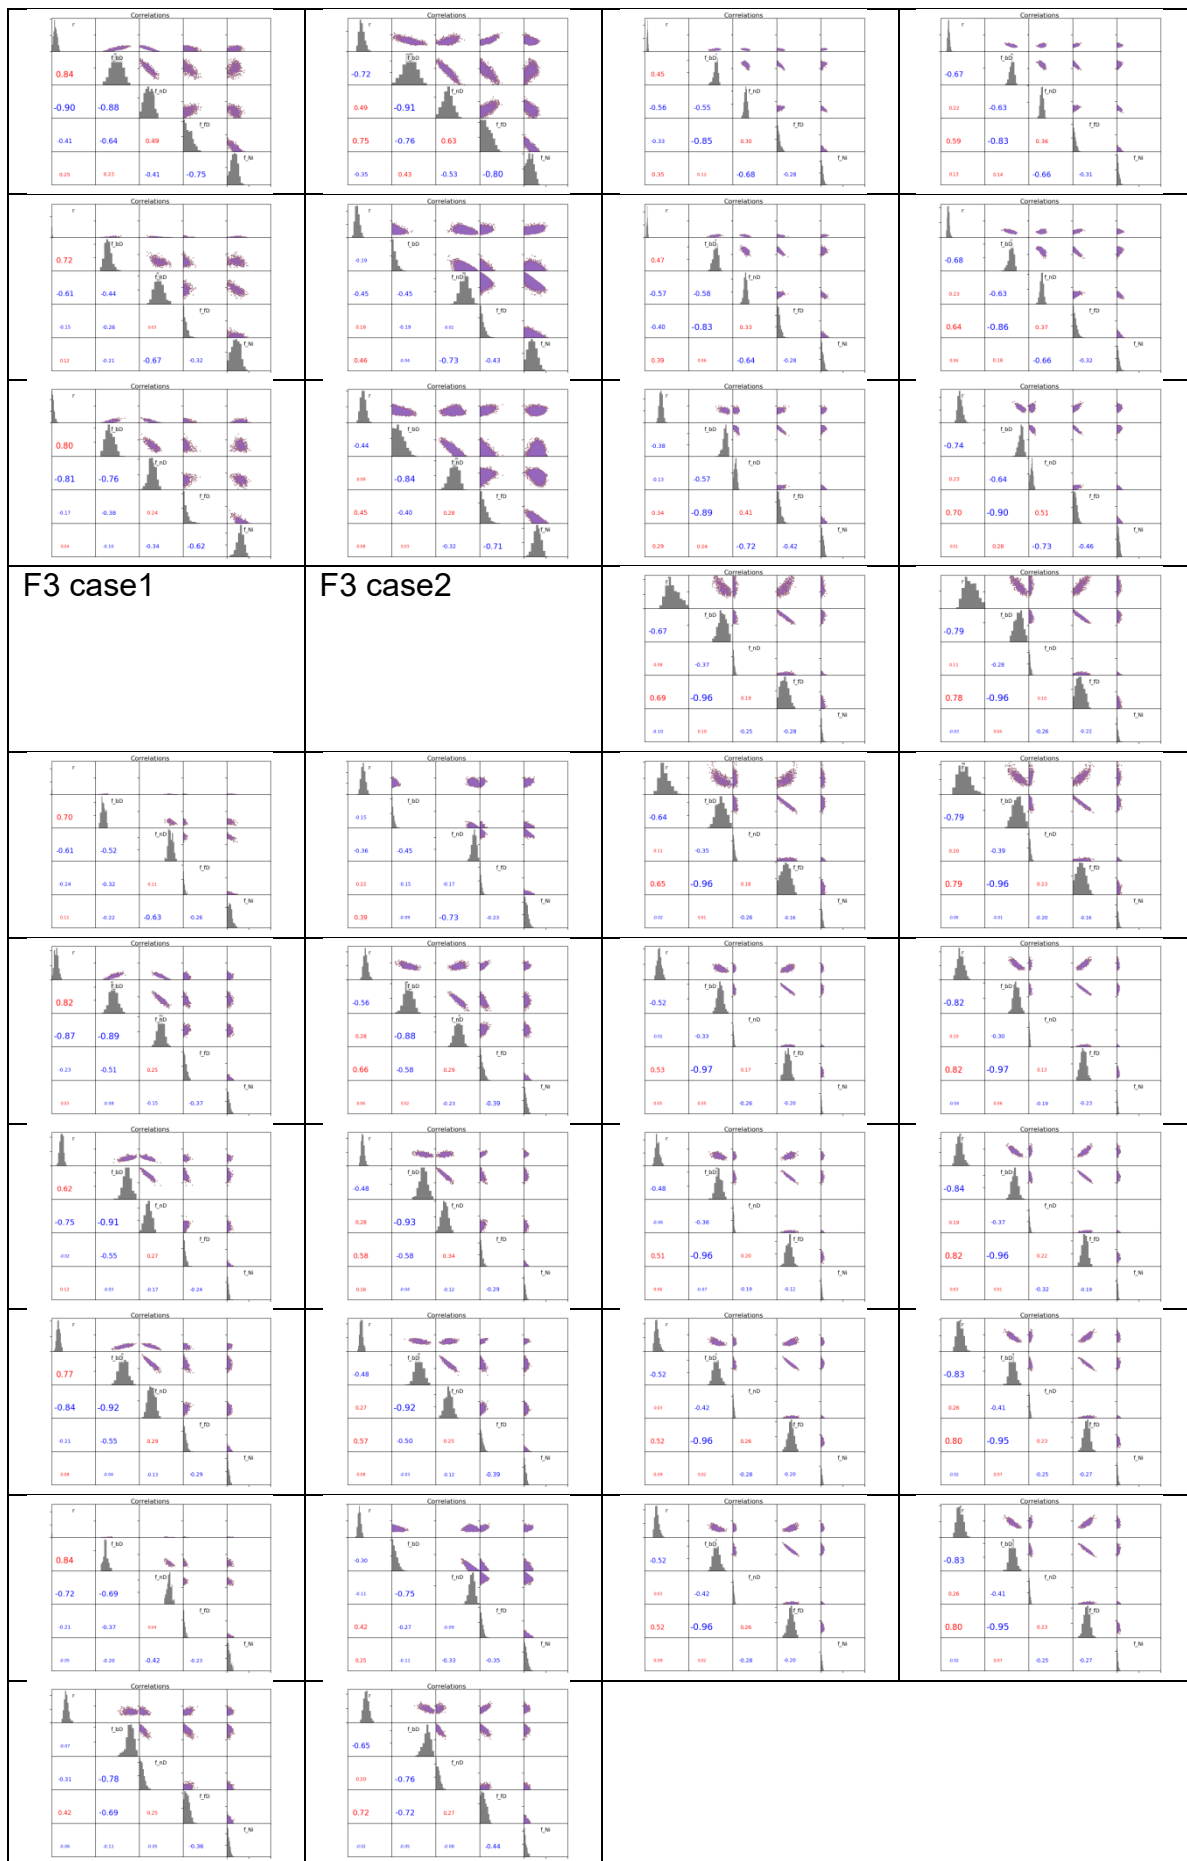

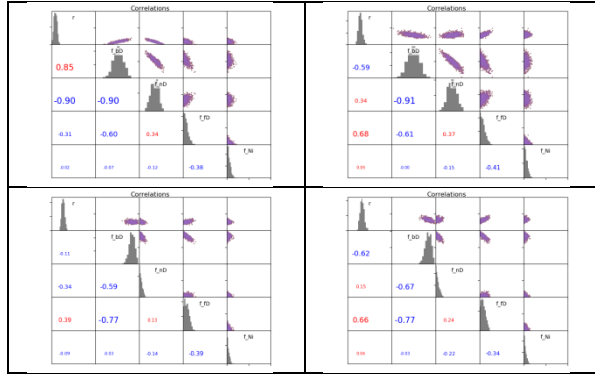

Fig. S4 Matrix plots presenting detailed 3DI model outputs for each sampling date for both calculating cases. The plots in the diagonal show histograms of posterior probability distribution of  $r_{N2O}$  and mixing fractions, the plots above the diagonal show correlations between the modeled fractions and the values below the diagonal show  $R$  coefficient of these correlations: in blue for positive correlations and in red for negative correlations with the size proportional to the  $R$  value.
